# Supplementary material for: Trisdibenzofuran-derived electron transport type exciton blocking materials for improved efficiency and lifetime in blue phosphorescent organic light-emitting diodes
Source: Royal Society of Chemistry journal article supplement (doi:10.1039/c7tc03336b), 2017-12-07
Supplement: c7tc03336b1.pdf [file c7tc03336b1.pdf]

## **Supporting information**

**Trisdibenzofuran derived electron transport type exciton blocking materials for improved efficiency and lifetime in blue phosphorescent organic light-emitting diodes**

**Ju Hui Yun<sup>+</sup>, Yu Jin Kang<sup>+</sup>, Si Hyun Han<sup>+</sup>, Jun Yeob Lee<sup>\*</sup>**

School of Chemical Engineering, Sungkyunkwan University  
2066, Seobu-ro, Jangan-gu, Suwon-si, Gyeonggi-do, 440-746, Korea

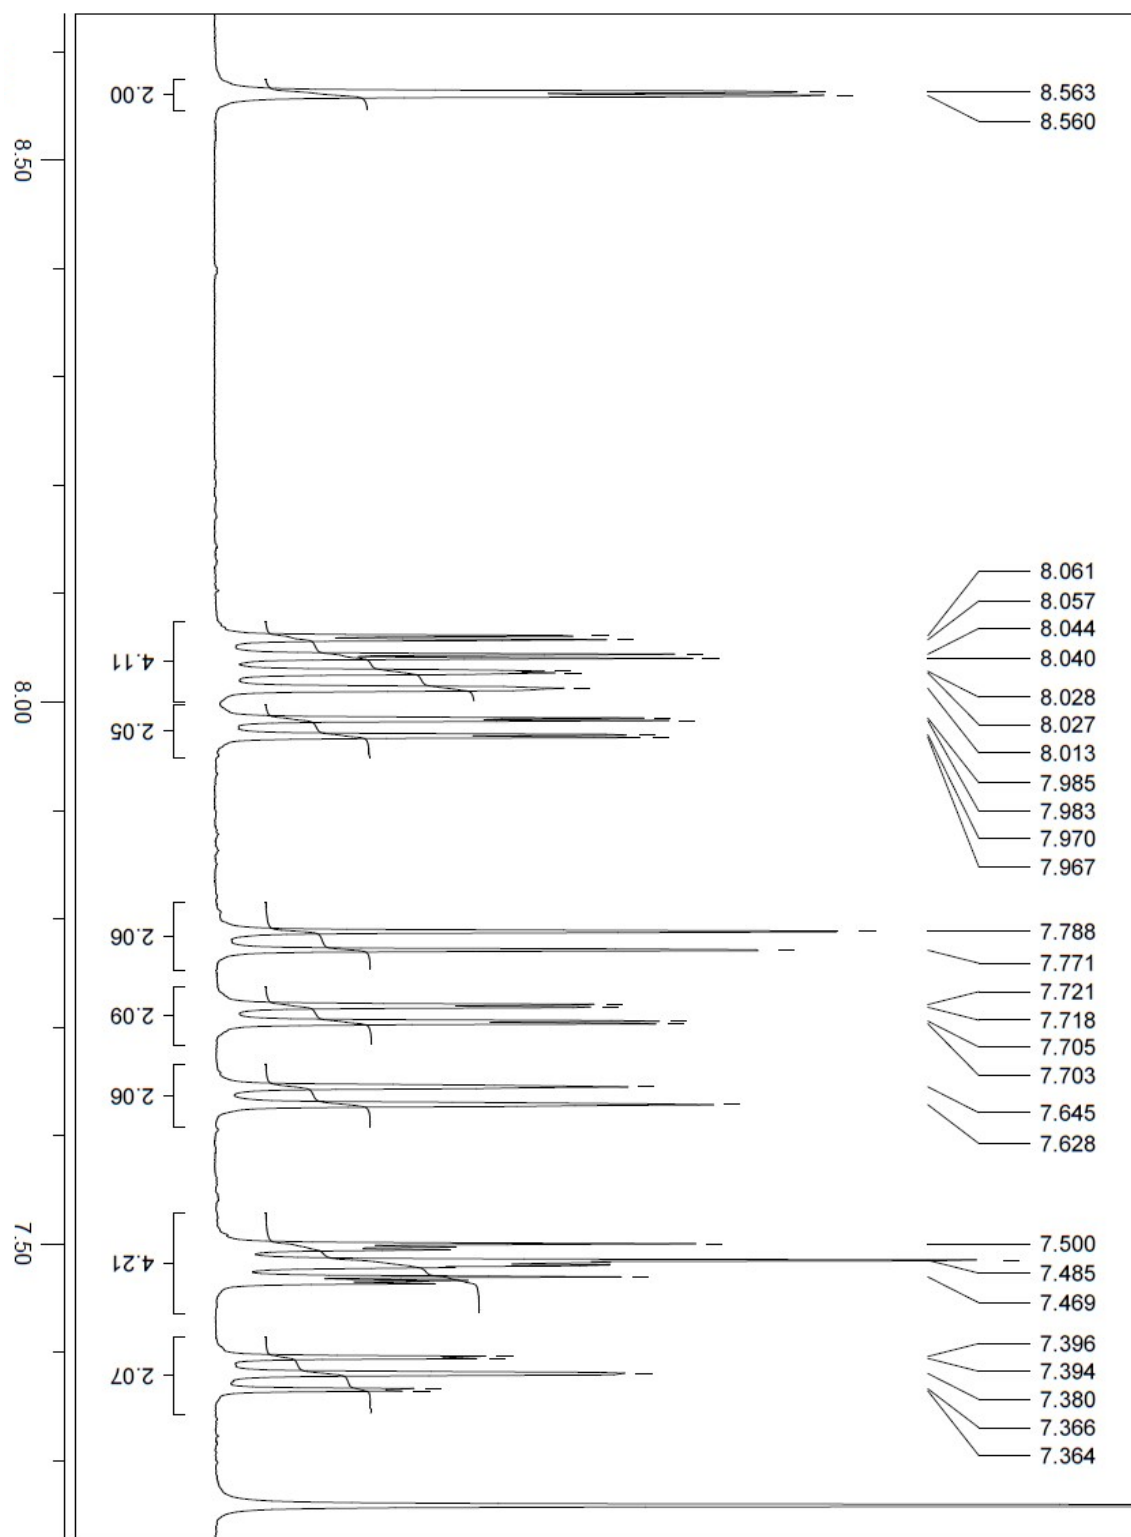

Figure S1.  $^1\text{H}$ -NMR spectrum of TDBF.

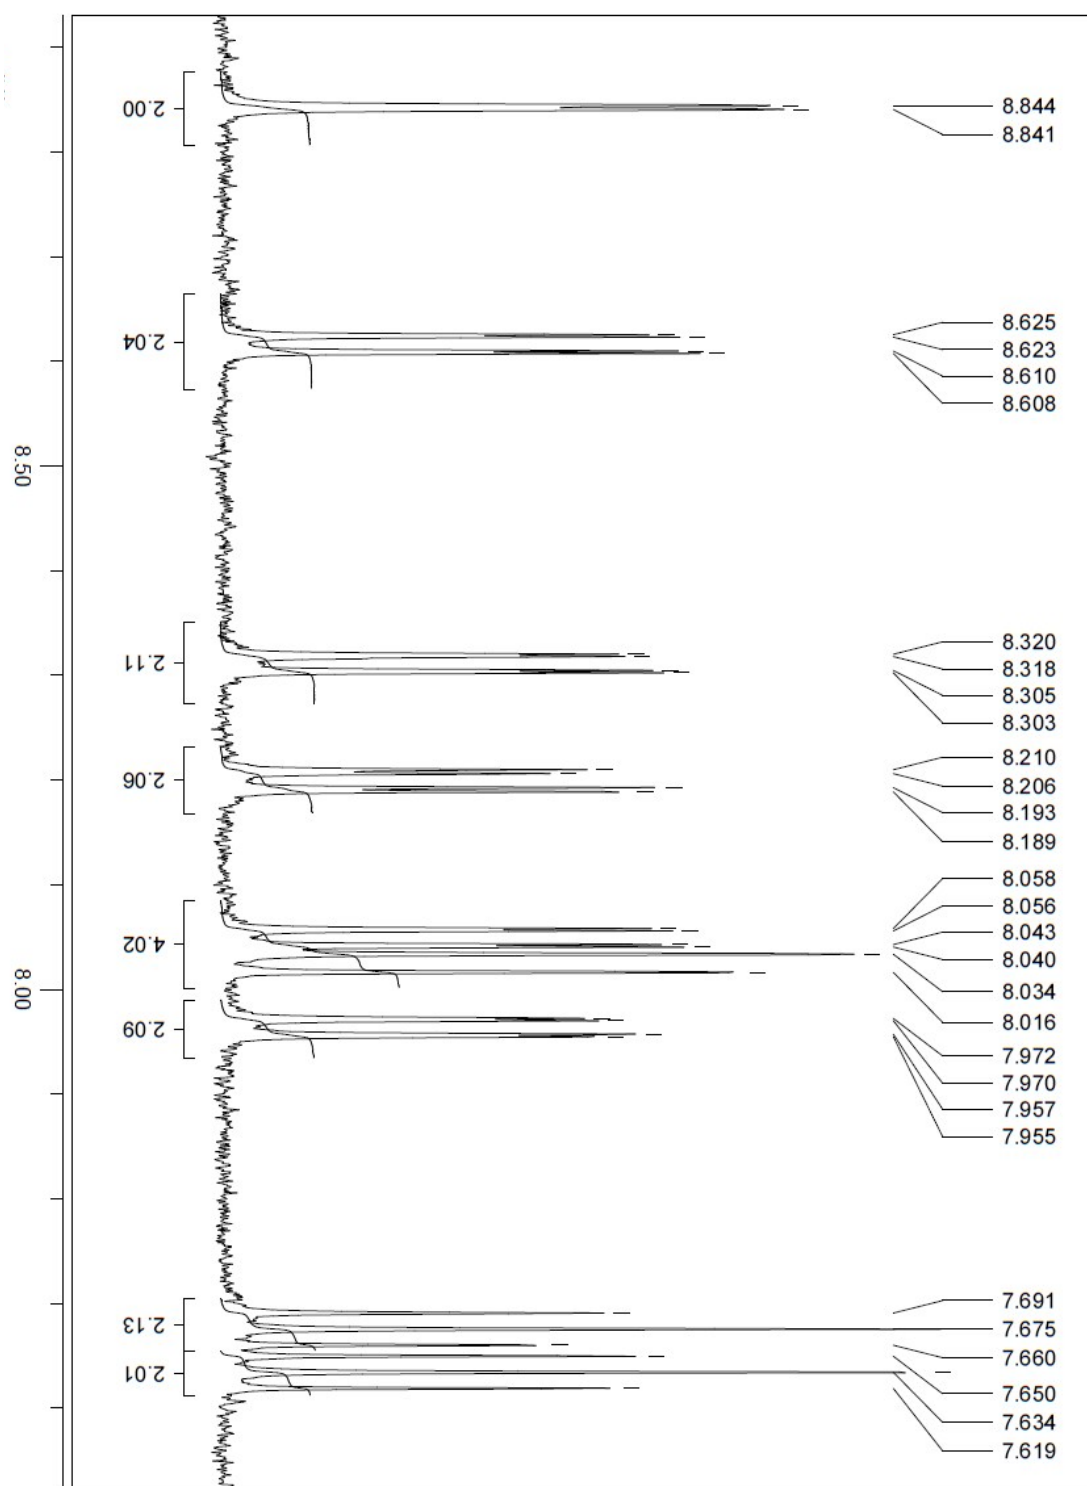

Figure S2.  $^1\text{H}$ -NMR spectrum of CNTDBF.
